# Supplementary material
Source: ML conference proceedings conference paper supplement (https://proceedings.neurips.cc/paper_files/paper/2019/hash/e6e713296627dff6475085cc6a224464-Abstract.html)
Supplement: Supplementary file [file e6e713296627dff6475085cc6a224464-Supplemental.zip]

---

# Supplementary material: Weakly Supervised Instance Segmentation using the Bounding Box Tightness Prior

---

Anonymous Author(s)

Affiliation

Address

email

1 In this supplementary material, we provide more detailed analysis of our proposed methods, including  
2 class-wise results and more visualization examples of our predicted results on the PASCAL VOC  
3 2012 dataset.

## 4 1 Class-wise Results

|                | Avg. | A.P. | Bike. | Bird | Boat | Bottle. | Bus  | Car  | Cat  | Chair | Cow  | D.T. | Dog  | Horse | M.B. | P.S. | P.P. | Sheep | Sofa | Train | TV   |
|----------------|------|------|-------|------|------|---------|------|------|------|-------|------|------|------|-------|------|------|------|-------|------|-------|------|
| $mAP_{0.25}^r$ | 75.0 | 87.7 | 19.1  | 87.8 | 71.1 | 62.0    | 87.7 | 74.8 | 94.3 | 43.4  | 83.3 | 65.0 | 94.4 | 84.7  | 89.4 | 82.7 | 61.8 | 72.9  | 63.3 | 91.4  | 82.5 |
| $mAP_{0.50}^r$ | 58.9 | 63.8 | 0.3   | 69.2 | 44.7 | 51.9    | 83.6 | 63.0 | 92.4 | 14.3  | 72.0 | 37.2 | 86.0 | 49.6  | 78.9 | 62.5 | 42.7 | 57.6  | 50.2 | 84.3  | 74.0 |
| $mAP_{0.70}^r$ | 30.4 | 22.3 | 0.0   | 21.0 | 21.0 | 31.1    | 70.3 | 40.5 | 65.4 | 5.4   | 19.2 | 22.9 | 48.1 | 5.1   | 24.9 | 20.6 | 13.9 | 15.7  | 37.9 | 66.9  | 56.3 |
| $mAP_{0.75}^r$ | 21.6 | 13.6 | 0.0   | 8.9  | 11.8 | 21.1    | 62.3 | 29.8 | 41.7 | 3.1   | 10.2 | 15.3 | 35.1 | 1.8   | 11.4 | 12.2 | 7.7  | 8.5   | 34.0 | 57.0  | 45.7 |

Table 1: Class-wise performance in the four measures,  $mAP_k^r$  where  $k \in \{0.25, 0.5, 0.7, 0.75\}$ , of our method for instance segmentation on the PASCAL VOC 2012 dataset.

## 5 2 Result Visualization

6 More example results of our proposed method on the PASCAL VOC 2012 dataset are shown  
7 in Figure 1, Figure 2, Figure 3 and Figure 4. Our proposed method is robust enough to deal with  
8 several difficult variations, such as occlusions, multiple scale or closeness between different instances.

9 From Figure 1, our model can successfully detect multiple instances and their corresponding masks.  
10 For example, in Figure 1 (a), although two instances from different classes, i.e., persons and motor-  
11 bikes, are presented, the instance segmentation masks are well predicted. Furthermore, in Figure 1 (d)  
12 and (f), object occlusions exist. Some parts of the train is occluded by the person in Figure 1 (d) while  
13 a person is occluded by a motorbike in Figure 1 (f). However, our model can still predict promising  
14 results. Small objects and object closeness are presented in Figure 1 (c) and (e), and in Figure 1,  
15 respectively, but the instance still can be well detected and segmented.

16 In Figure 2, the instances in each images belong to same category, so the detector are more likely to  
17 be misled by similar appearance. However, as shown in Figure 2, our model can well distinguish  
18 the instances even if they have similar appearance to each other. Moreover, the similar variations  
19 discussed in the previous paragraph are also observed in Figure 2, but our method can still predict the  
20 promising results.

21 In Figure 3 and Figure 4, we show some simple cases which only one instance is presented in each  
22 image. There exists no occlusion or closeness between the instances, so the predicted results are  
23 much better than the ones in Figure 1 and Figure 2.

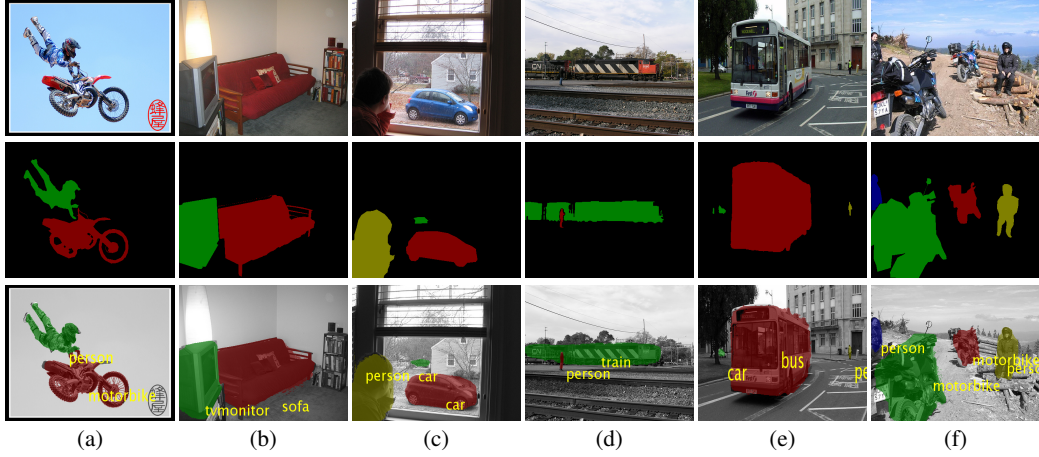

Figure 1: The examples of the segmentation results produced by our method. From the top row to the bottom row, the input images, the corresponding ground truth masks and the corresponding segmentation results are shown, respectively. In the segmentation results, different instances are indicated by different colors. Their categories are identified by texts.

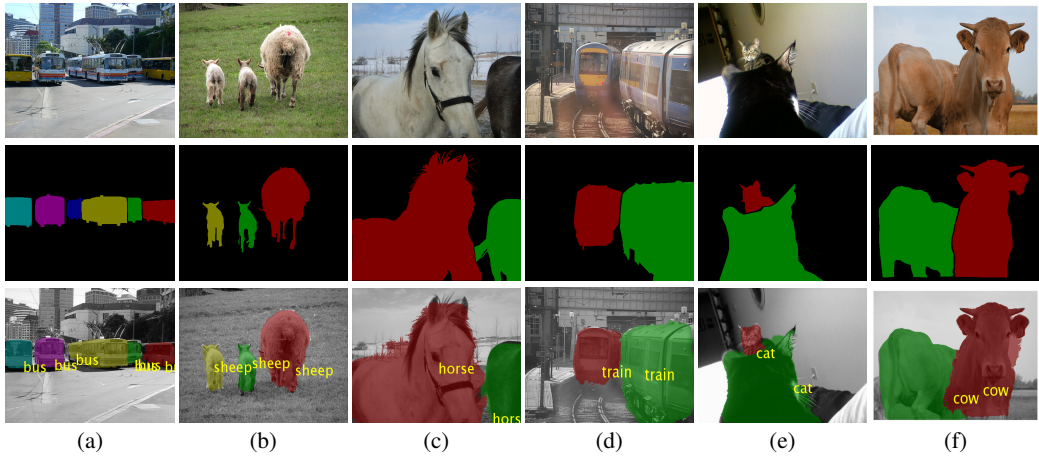

Figure 2: The examples of the segmentation results produced by our method. From the top row to the bottom row, the input images, the corresponding ground truth masks and the corresponding segmentation results are shown, respectively. In the segmentation results, different instances are indicated by different colors. Their categories are identified by texts.

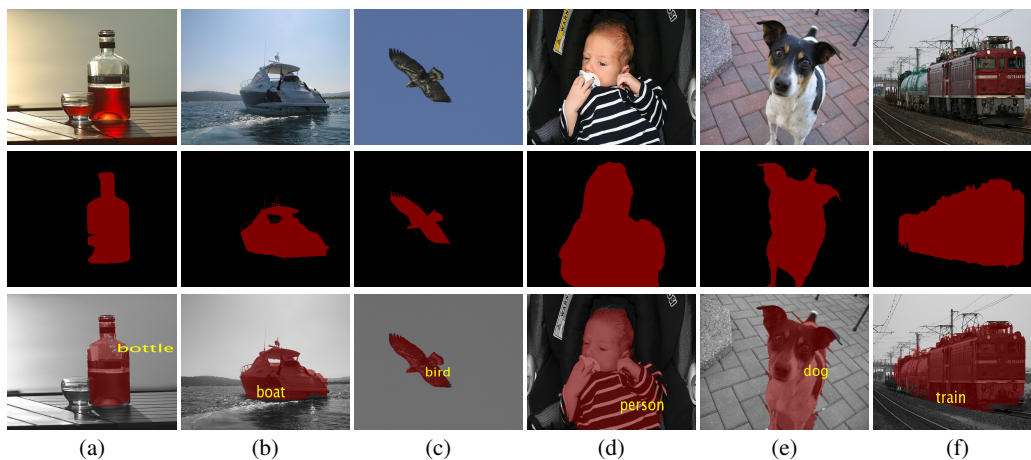

Figure 3: The examples of the segmentation results produced by our method. From the top row to the bottom row, the input images, the corresponding ground truth masks and the corresponding segmentation results are shown, respectively. In the segmentation results, different instances are indicated by different colors. Their categories are identified by texts.

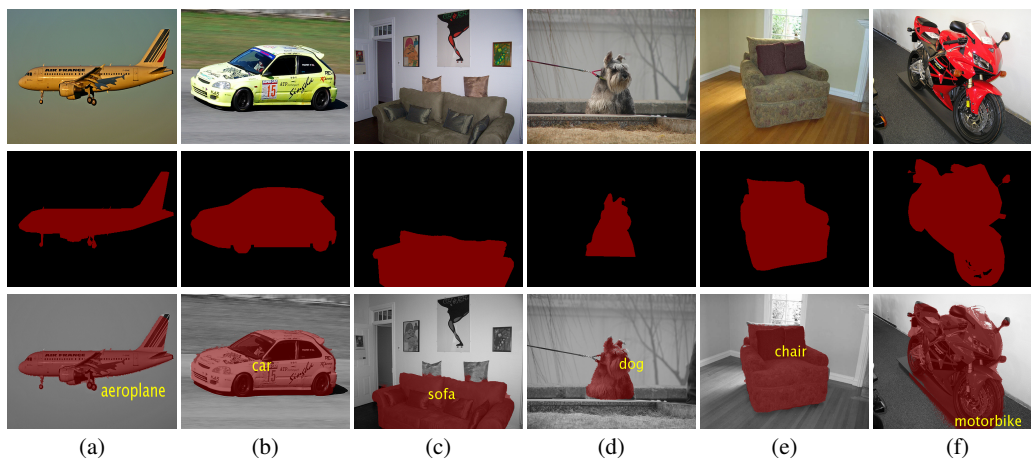

Figure 4: The examples of the segmentation results produced by our method. From the top row to the bottom row, the input images, the corresponding ground truth masks and the corresponding segmentation results are shown, respectively. In the segmentation results, different instances are indicated by different colors. Their categories are identified by texts.
